# Supplementary material
Source: PubMed Central journal article supplement (PMC7198597)
Supplement: 41421_2020_168_MOESM1_ESM.pdf [file 41421_2020_168_MOESM1_ESM.pdf]

**a**

| <b>a: clinical data of the enrolled subjects: ERS and LRS</b> |                        |                                              |                    |                        |                    |                                      |                                              |                    |                                                |                                              |
|---------------------------------------------------------------|------------------------|----------------------------------------------|--------------------|------------------------|--------------------|--------------------------------------|----------------------------------------------|--------------------|------------------------------------------------|----------------------------------------------|
|                                                               | ERS-1                  | ERS-2                                        | ERS-3              | ERS-4                  | ERS-5              | LRS-1                                | LRS-2                                        | LRS-3              | LRS-4                                          | LRS-5                                        |
| <b>Gender</b>                                                 | male                   | male                                         | female             | female                 | female             | male                                 | male                                         | male               | female                                         | female                                       |
| <b>Smoking History</b>                                        | -                      | now                                          | -                  | -                      | -                  | once                                 | now                                          | now                | now                                            | -                                            |
| <b>Wuhan Exposure History</b>                                 | +                      | +                                            | +                  | +                      | +                  | +                                    | +                                            | +                  | +                                              | +                                            |
| <b>First Negative Nucleic Acid Transfer</b>                   | February 16, 2020      | February 19, 2020                            | February 7, 2020   | February 14, 2020      | February 8, 2020   | February 3, 2020                     | February 8, 2020                             | February 13, 2020  | January 29, 2020                               | February 1, 2020                             |
| <b>Severity</b>                                               | moderate               | moderate                                     | severe             | severe                 | moderate           | severe                               | moderate                                     | moderate           | severe                                         | severe                                       |
| <b>Fever</b>                                                  | +                      | +                                            | +                  | +                      | +                  | +                                    | +                                            | +                  | +                                              | +                                            |
| <b>Conjunctival Congestion</b>                                | -                      | -                                            | -                  | -                      | -                  | -                                    | -                                            | -                  | -                                              | -                                            |
| <b>Rhinobyon</b>                                              | -                      | -                                            | -                  | -                      | -                  | -                                    | +                                            | -                  | -                                              | -                                            |
| <b>Cough</b>                                                  | +                      | +                                            | -                  | +                      | +                  | +                                    | -                                            | +                  | +                                              | +                                            |
| <b>Sore throat</b>                                            | +                      | +                                            | -                  | +                      | +                  | +                                    | -                                            | +                  | +                                              | +                                            |
| <b>Expectoration</b>                                          | +                      | +                                            | +                  | +                      | +                  | +                                    | -                                            | +                  | +                                              | +                                            |
| <b>Exhaustion</b>                                             | +                      | +                                            | +                  | -                      | +                  | +                                    | +                                            | +                  | +                                              | +                                            |
| <b>Hemoptysis</b>                                             | -                      | +                                            | -                  | +                      | -                  | -                                    | -                                            | -                  | +                                              | -                                            |
| <b>Breathe Hard</b>                                           | -                      | +                                            | +                  | +                      | +                  | +                                    | +                                            | +                  | +                                              | +                                            |
| <b>Emesis</b>                                                 | -                      | +                                            | -                  | -                      | -                  | -                                    | +                                            | -                  | +                                              | -                                            |
| <b>Diarrhea</b>                                               | -                      | -                                            | -                  | -                      | -                  | -                                    | +                                            | -                  | -                                              | -                                            |
| <b>Muscle or Joint Pain</b>                                   | -                      | +                                            | -                  | +                      | +                  | +                                    | +                                            | +                  | +                                              | +                                            |
| <b>Chilly</b>                                                 | +                      | +                                            | -                  | +                      | +                  | +                                    | +                                            | +                  | +                                              | +                                            |
| <b>Throat Congestion</b>                                      | +                      | +                                            | +                  | +                      | +                  | +                                    | -                                            | -                  | +                                              | +                                            |
| <b>Tonsil Edema</b>                                           | -                      | +                                            | +                  | +                      | -                  | -                                    | -                                            | -                  | -                                              | +                                            |
| <b>Lymphadenovarix</b>                                        | -                      | -                                            | -                  | -                      | -                  | -                                    | -                                            | -                  | -                                              | -                                            |
| <b>Rash</b>                                                   | -                      | -                                            | -                  | -                      | -                  | -                                    | -                                            | -                  | -                                              | -                                            |
| <b>CT Finding</b>                                             | Bilaeral pneumonia     | Bilaeral pneumonia                           | Bilaeral pneumonia | Bilaeral pneumonia     | Bilaeral pneumonia | Bilaeral pneumonia                   | Bilaeral pneumonia                           | Bilaeral pneumonia | Bilaeral pneumonia                             | Bilaeral pneumonia                           |
| <b>Chronic Basic Disease</b>                                  | coronary heart disease | tumor and gastritis                          | HBV                | diabetes               | hypertension       | hypertension; coronary heart disease | hypertension; coronary heart disease; HBV    | hypertension       | hypertension; coronary heart disease; diabetes | -                                            |
| <b>Ventilator</b>                                             | -                      | -                                            | -                  | +                      | -                  | -                                    | -                                            | -                  | -                                              | -                                            |
| <b>Methylprednisolone</b>                                     | -                      | -                                            | 40mg               | 80mg                   | 40mg               | 40mg                                 | -                                            | 40mg               | 40mg                                           | 80mg                                         |
| <b>Antiviral Drug</b>                                         | Oseltamivir            | Lopinavir and Ritonavir Tablets; Oseltamivir | Oseltamivir        | Ritonavir; Oseltamivir | Oseltamivir        | Oseltamivir                          | Lopinavir and Ritonavir Tablets; Oseltamivir | Oseltamivir        | Oseltamivir                                    | Lopinavir and Ritonavir Tablets; Oseltamivir |

**b**

| <b>b: clinical data of the enrolled subjects: HC</b> |      |      |        |        |        |
|------------------------------------------------------|------|------|--------|--------|--------|
|                                                      | HC-1 | HC-2 | HC-3   | HC-4   | HC-5   |
| <b>Gender</b>                                        | male | male | female | female | female |
| <b>Chronic Basic Disease</b>                         | -    | -    | -      | -      | -      |

**c**

| <b>c</b>                | <b>HC</b> |       |        |         | <b>ERS</b> |       |        |         | <b>LRS</b> |       |        |         | <b>P value</b> |
|-------------------------|-----------|-------|--------|---------|------------|-------|--------|---------|------------|-------|--------|---------|----------------|
|                         | mean      | SD    | median | percent | mean       | SD    | median | percent | mean       | SD    | median | percent |                |
| <b>Age (years)</b>      | 55.4      | 14.79 | 55     |         | 58         | 11.77 | 58     |         | 55.2       | 17.46 | 49     |         | 0.78           |
| <b>Gender (male, %)</b> |           |       |        | 40      |            |       |        | 40      |            |       |        | 60      | 0.76           |

a

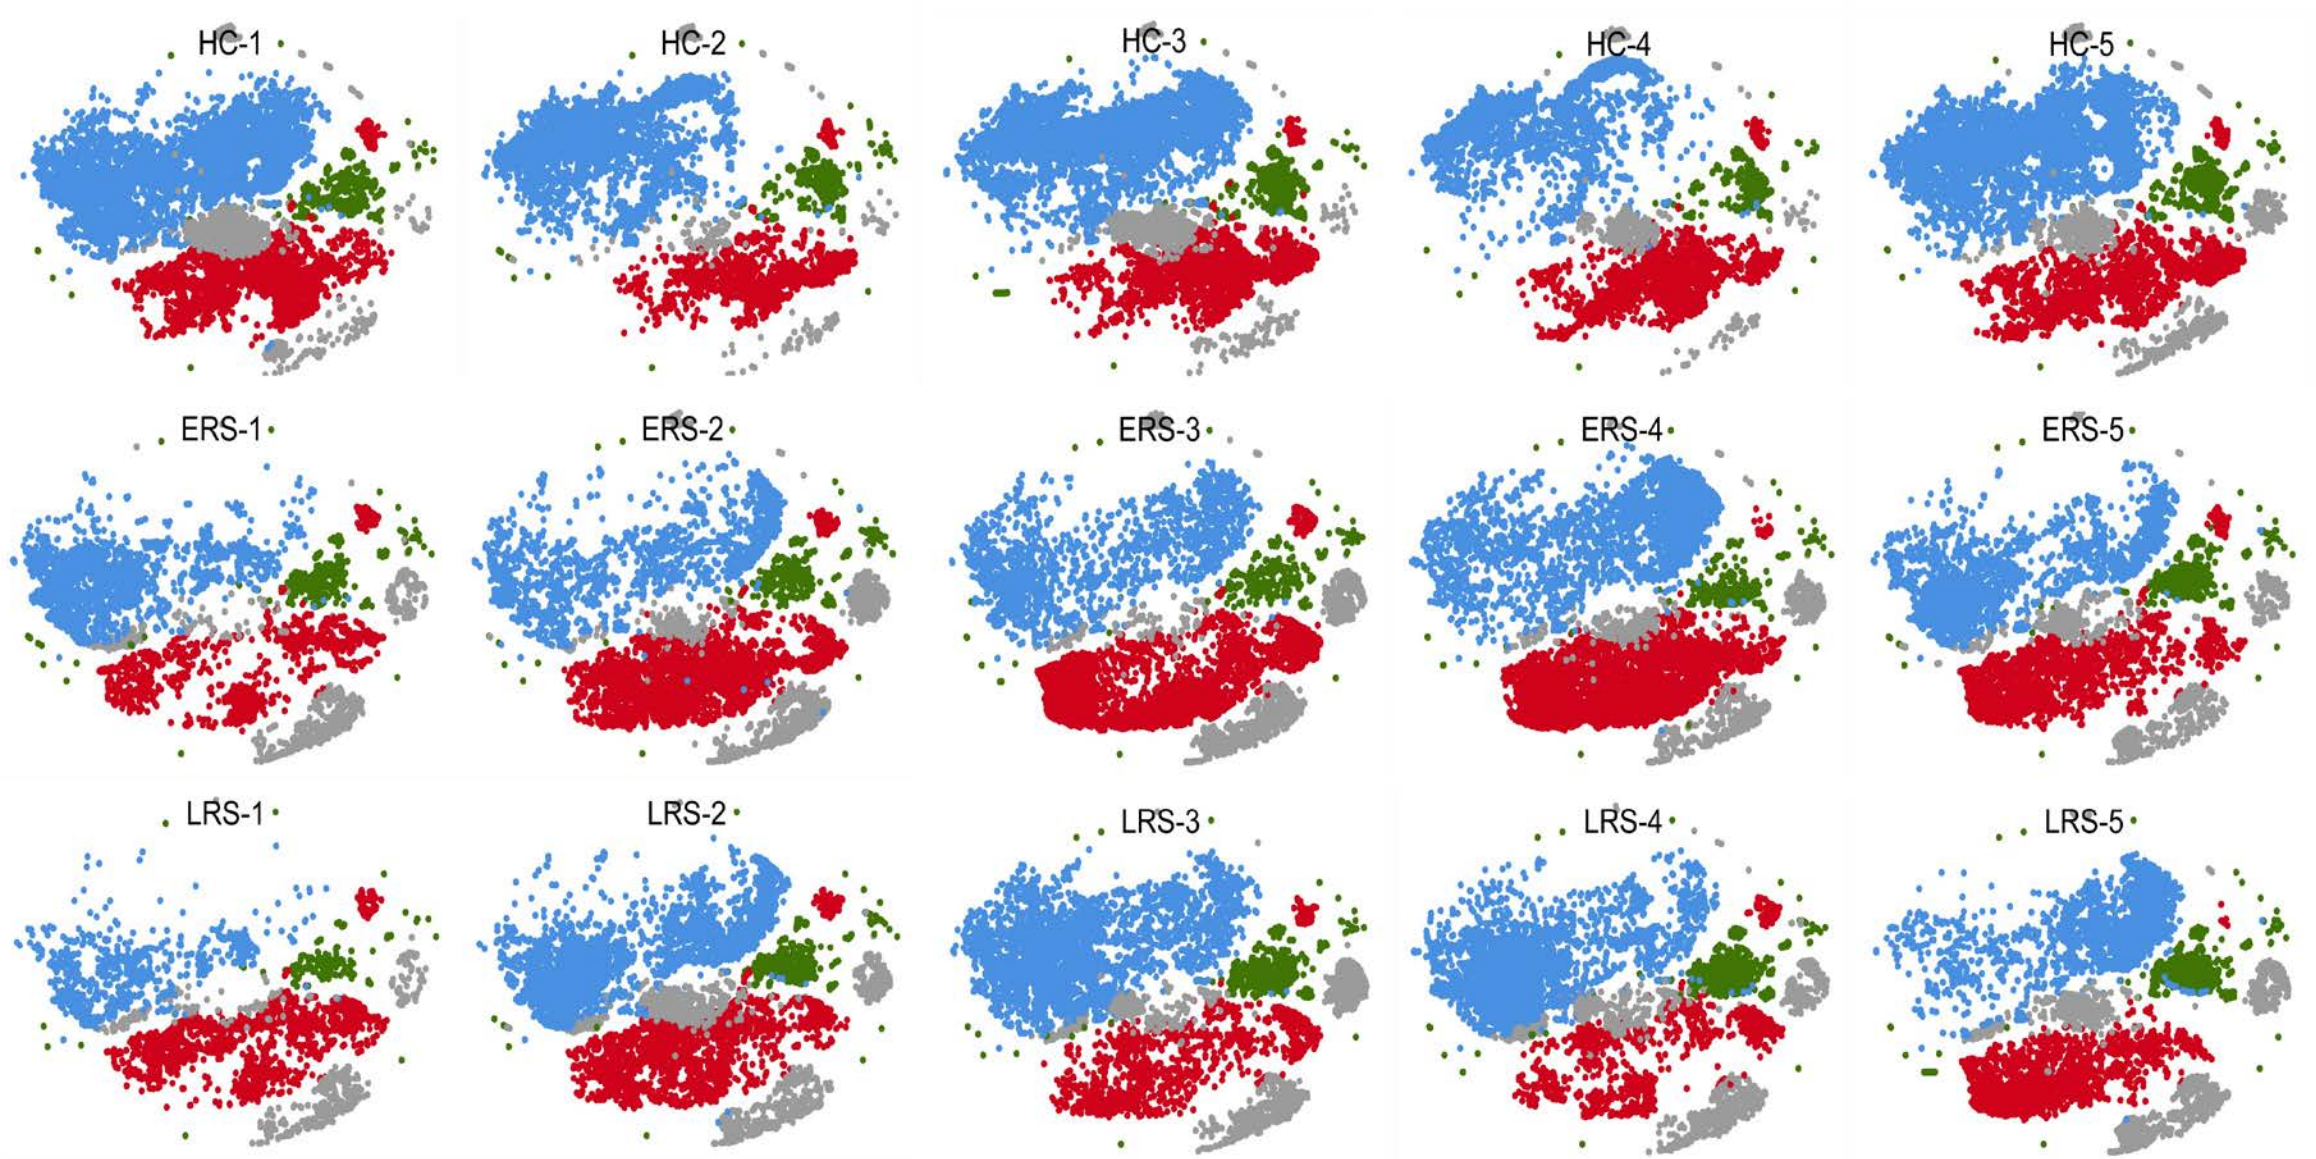



a

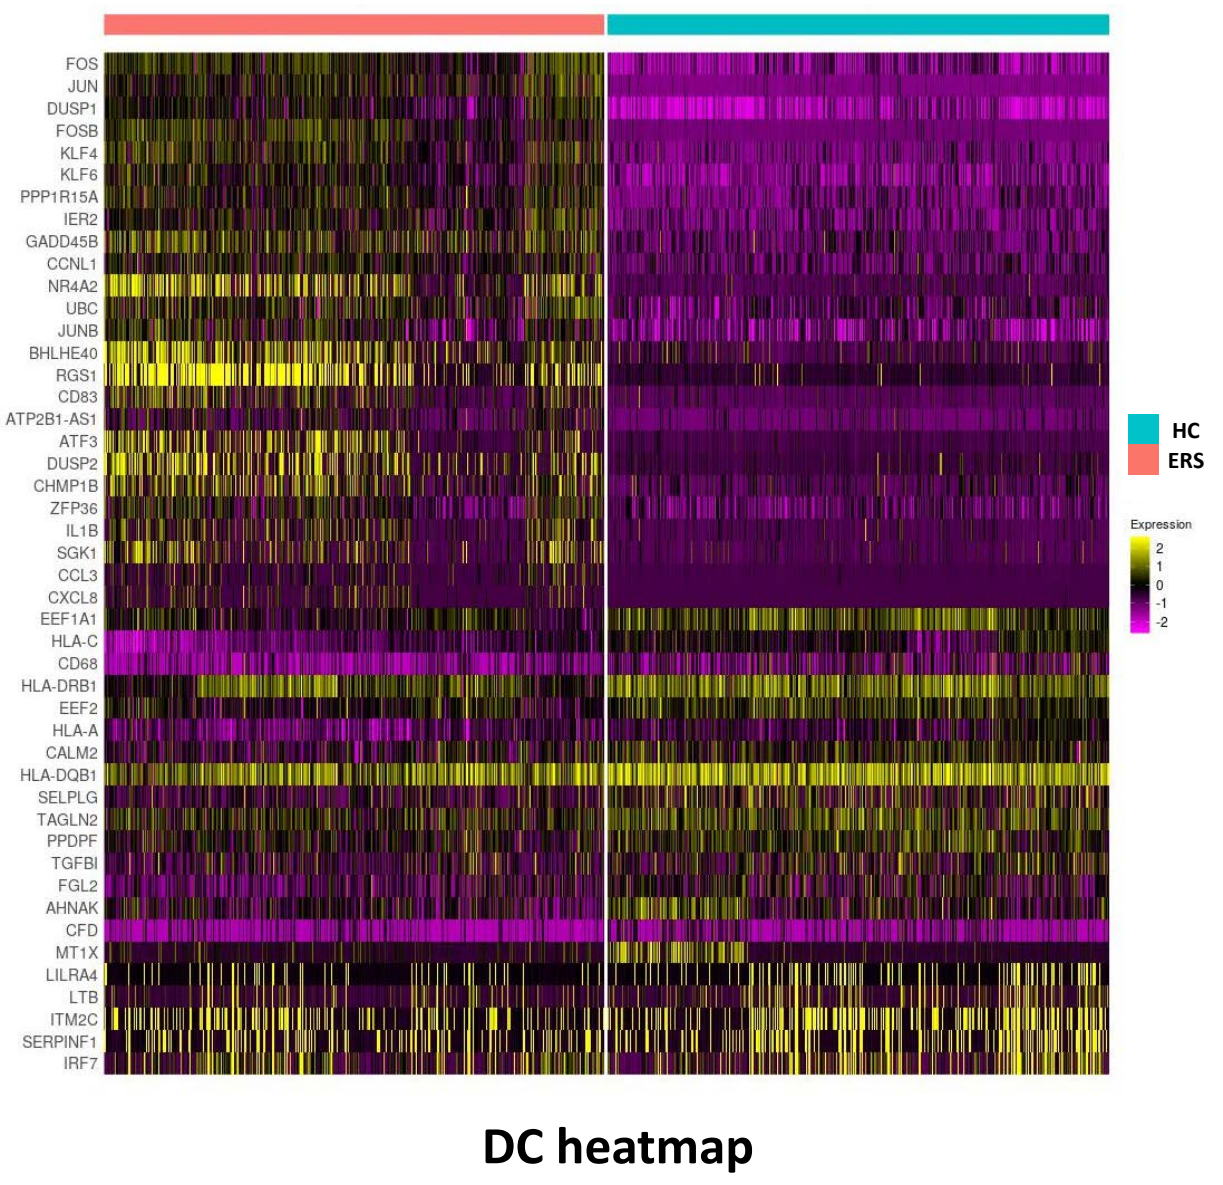

b

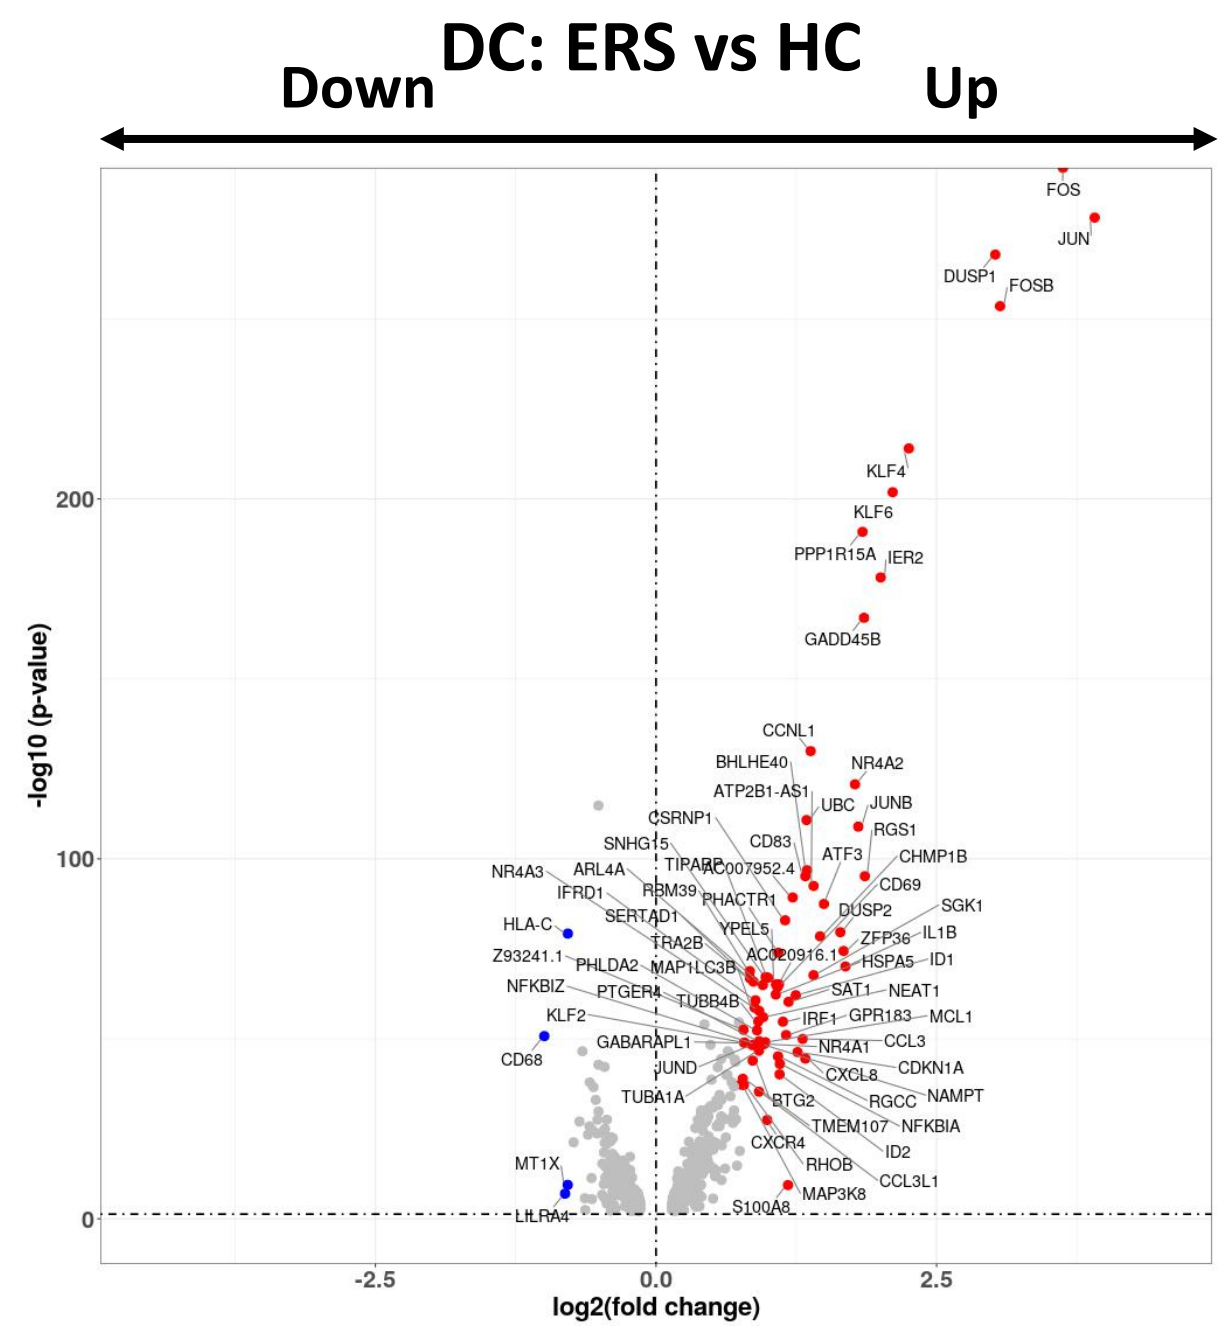

c

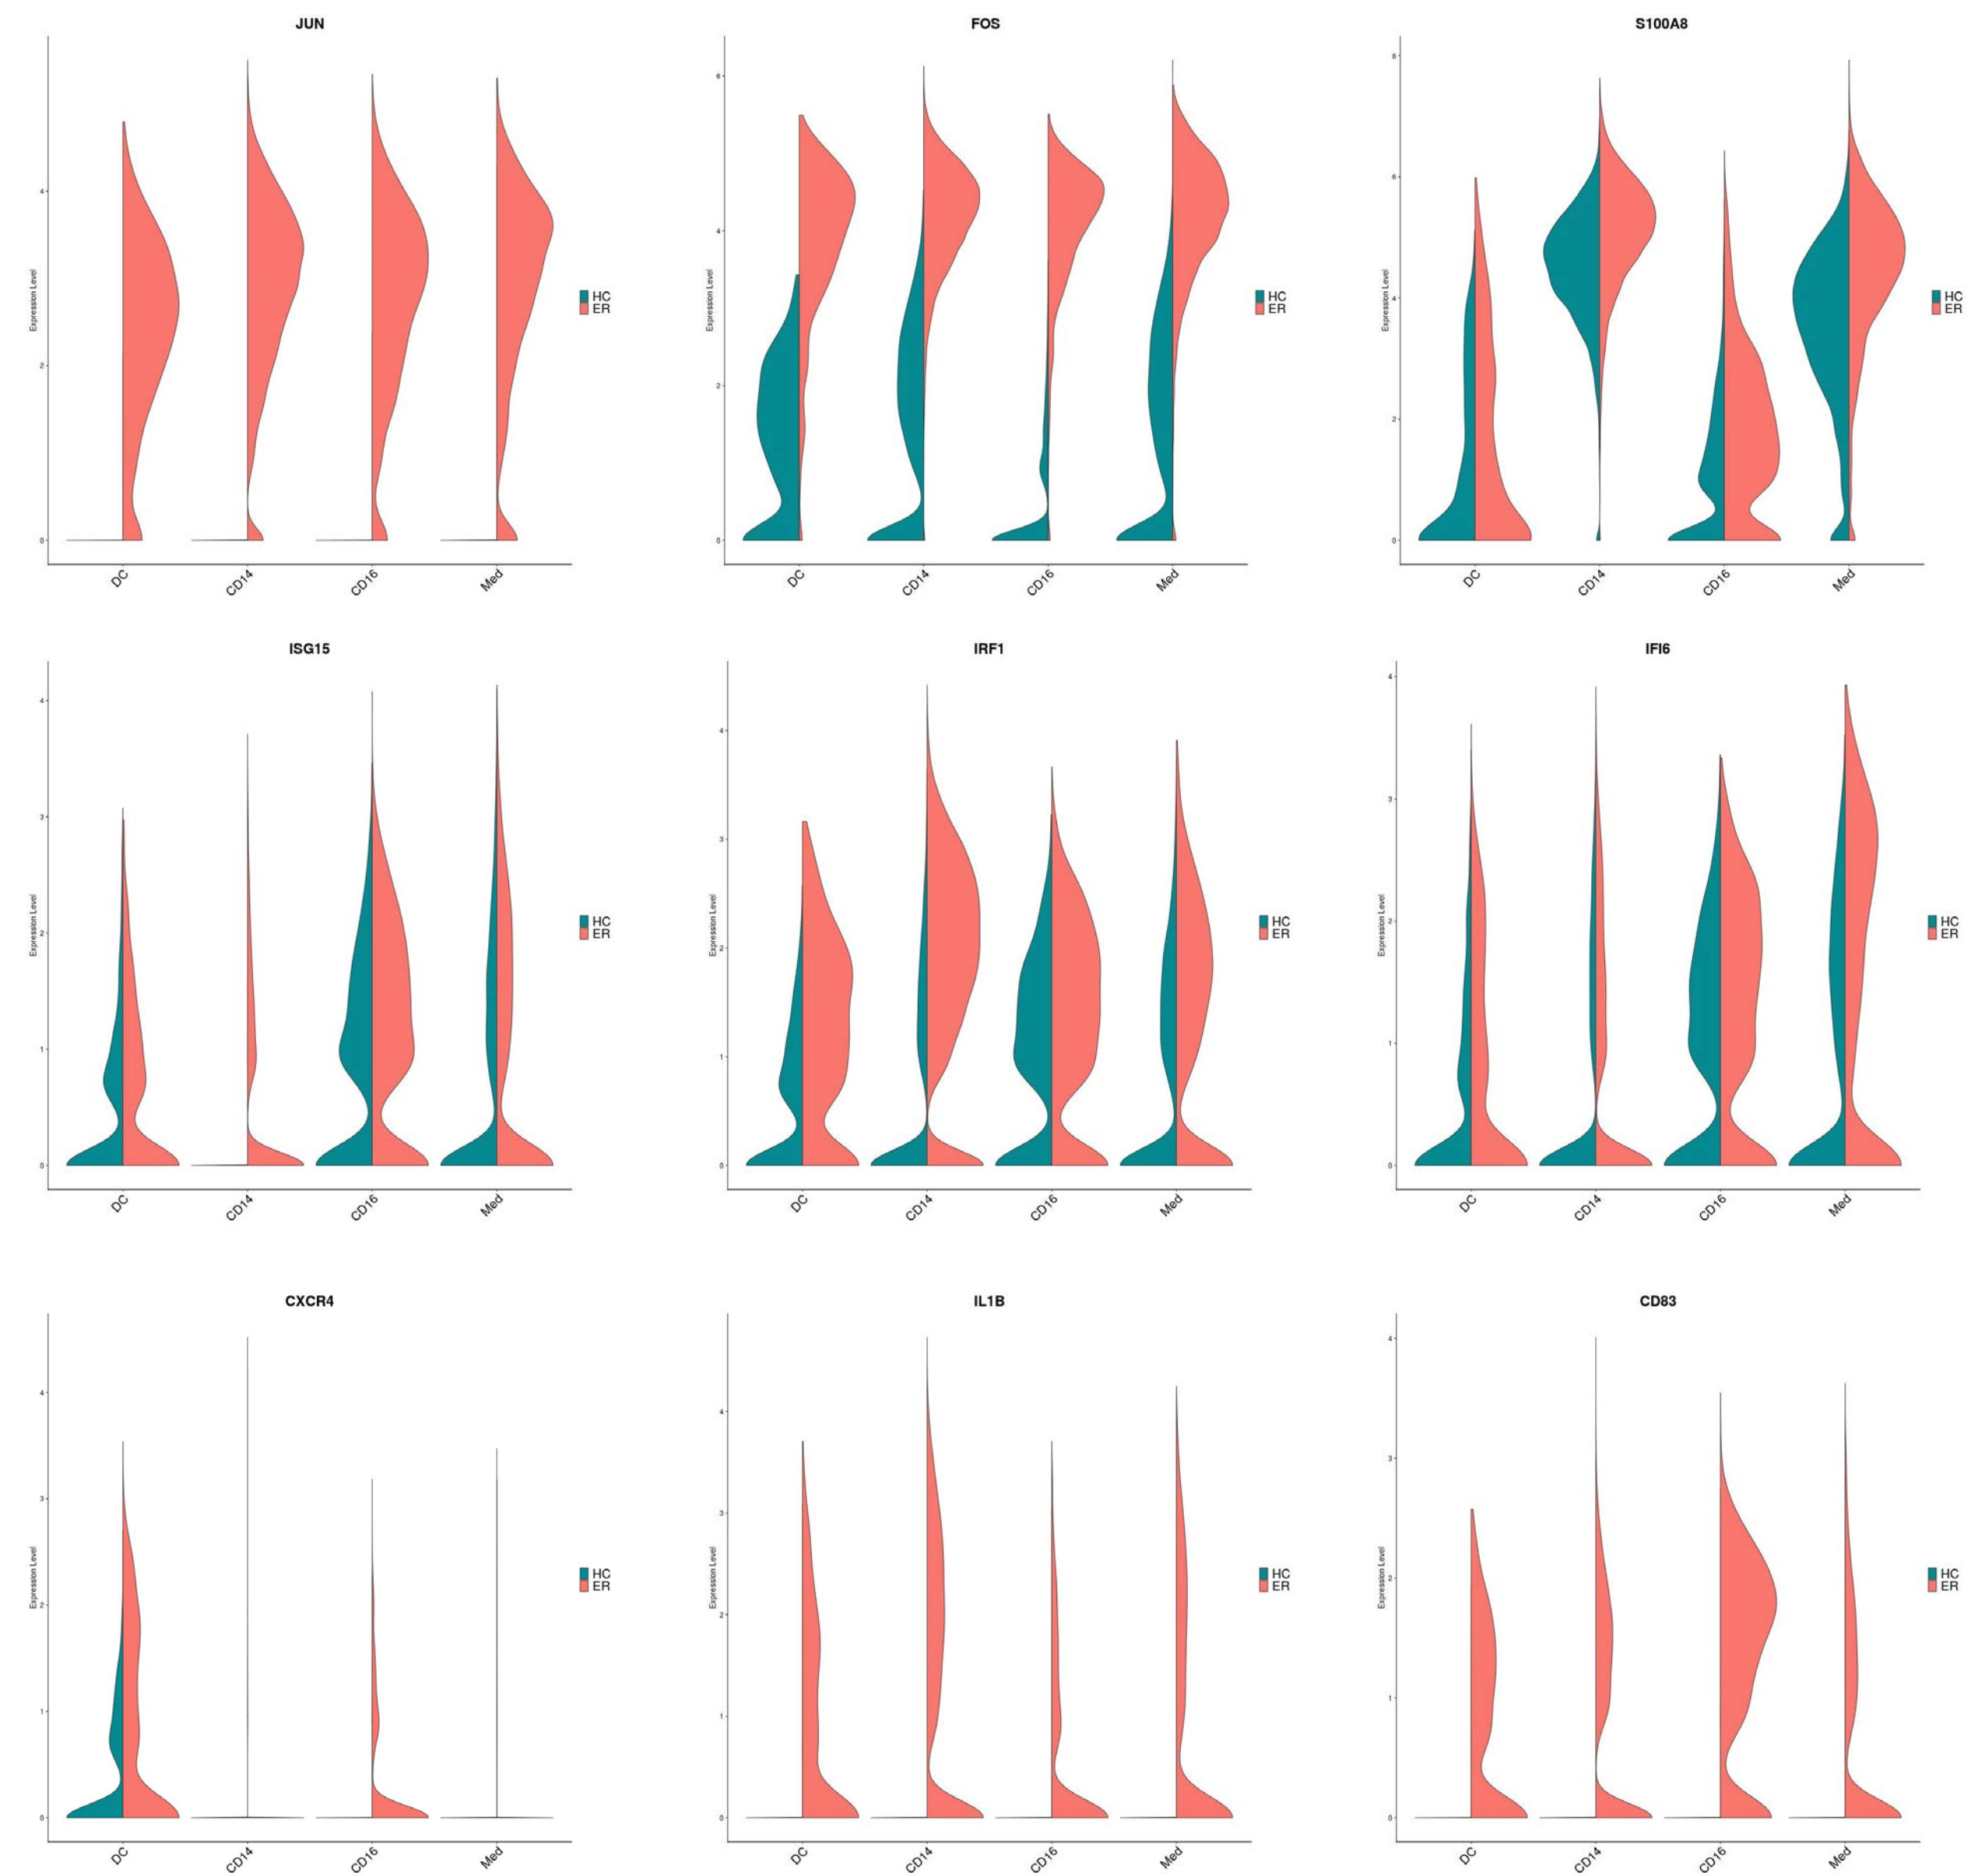



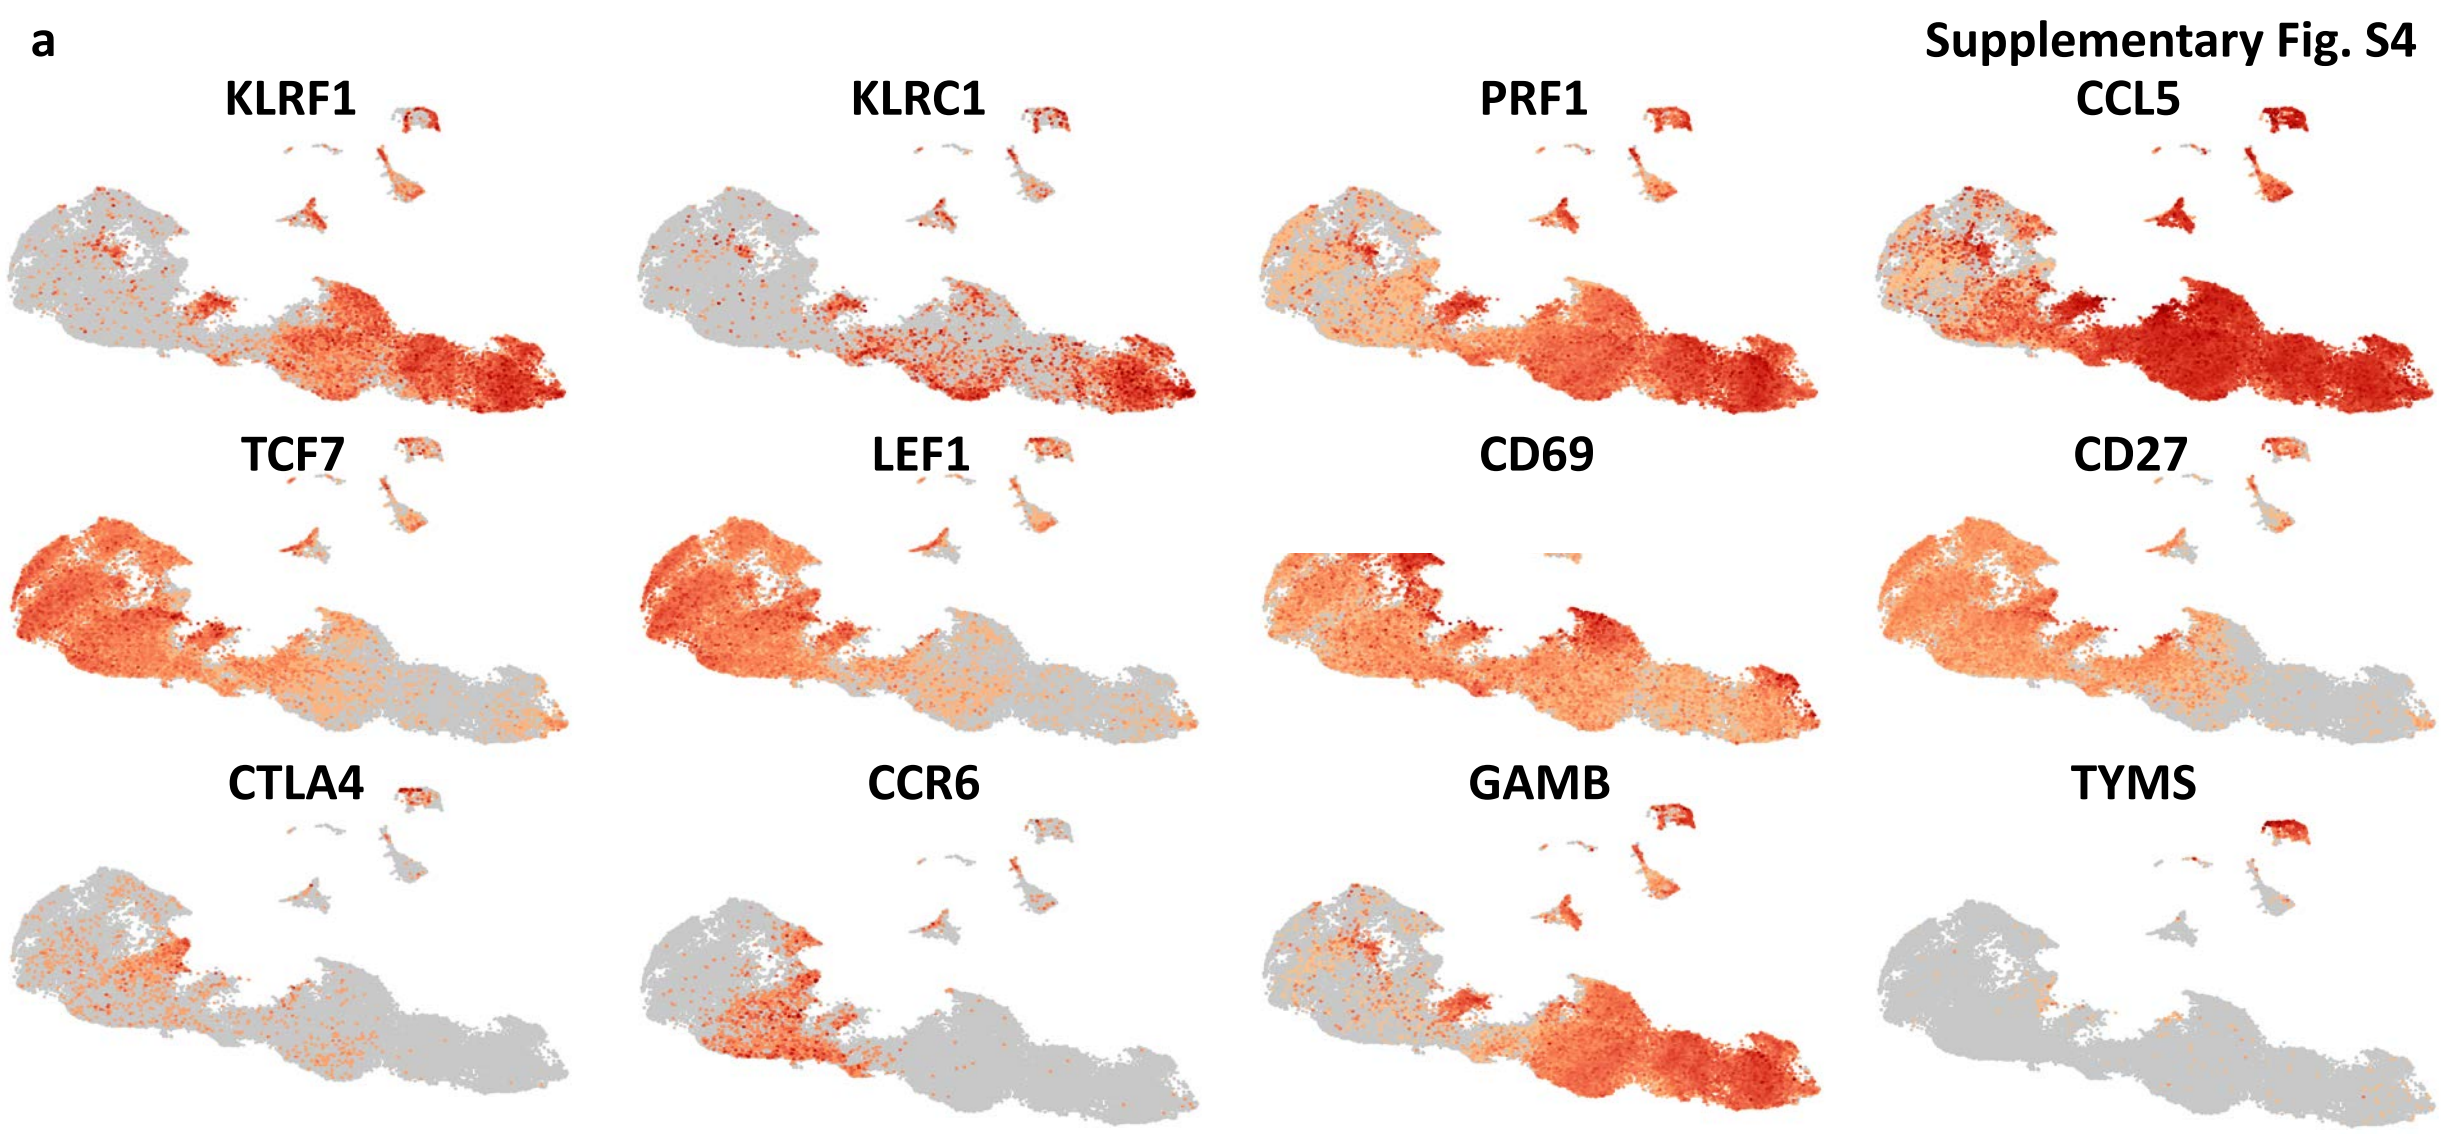

**b**  
Up in CD8+ CTLs of ERS

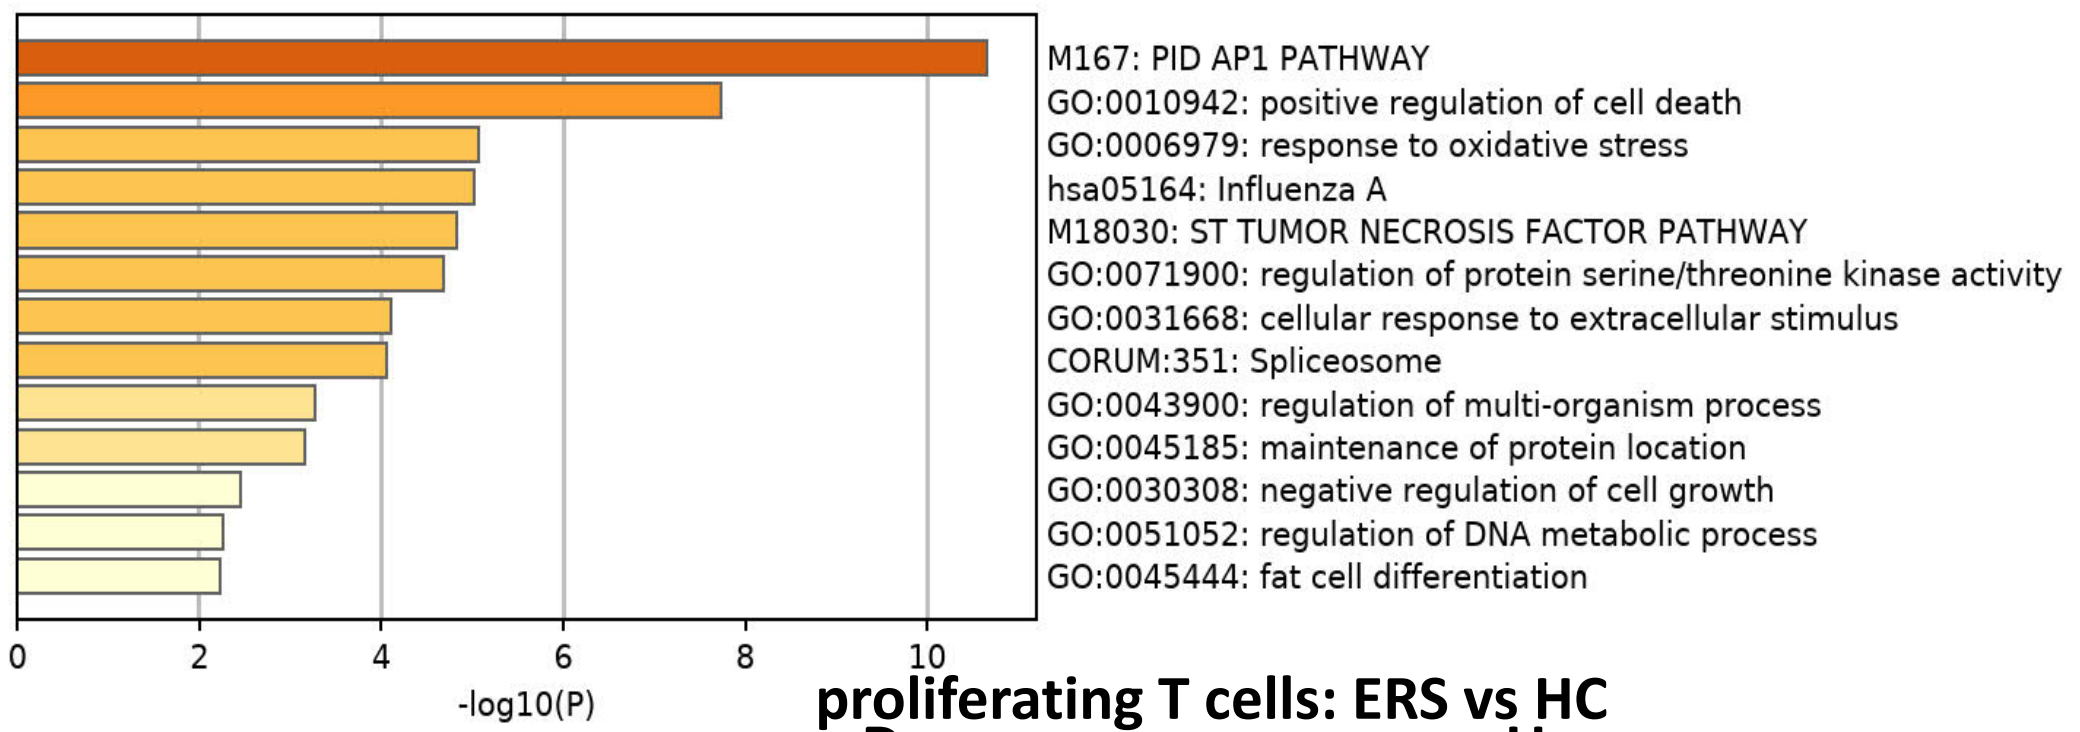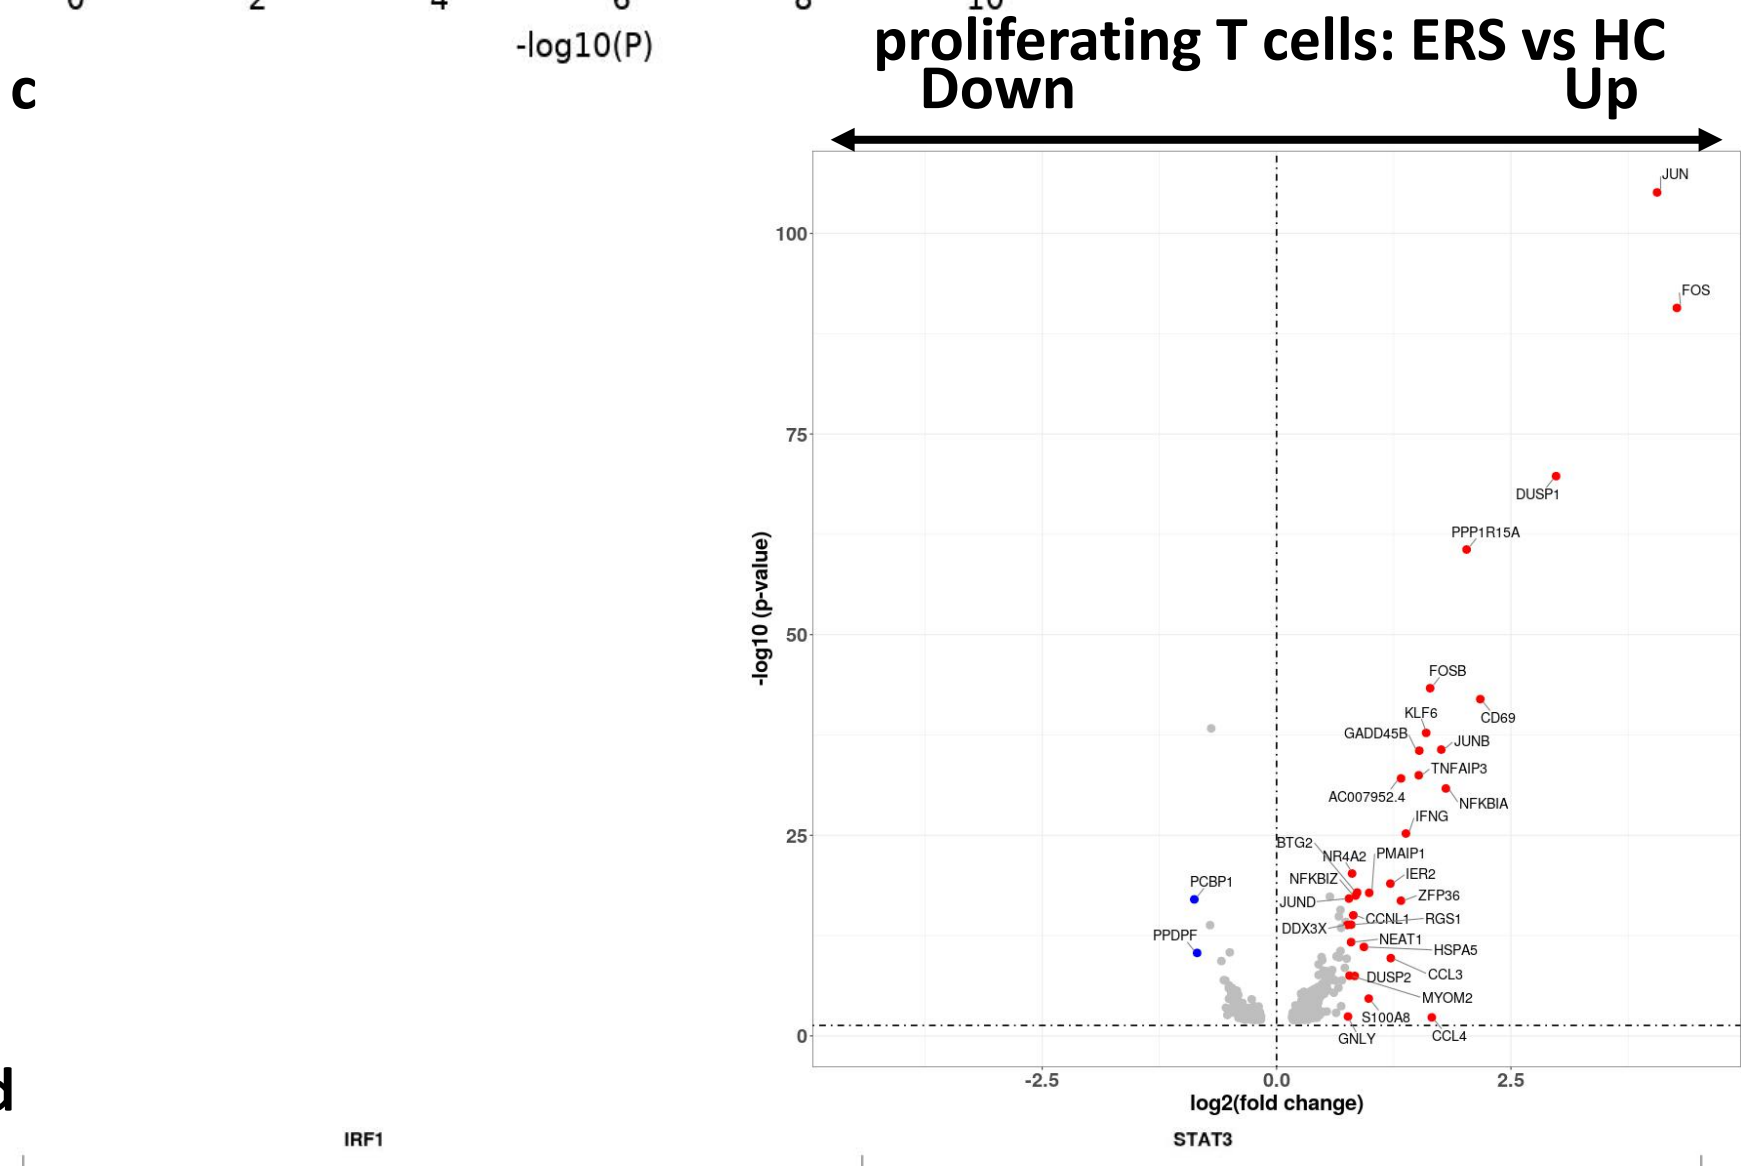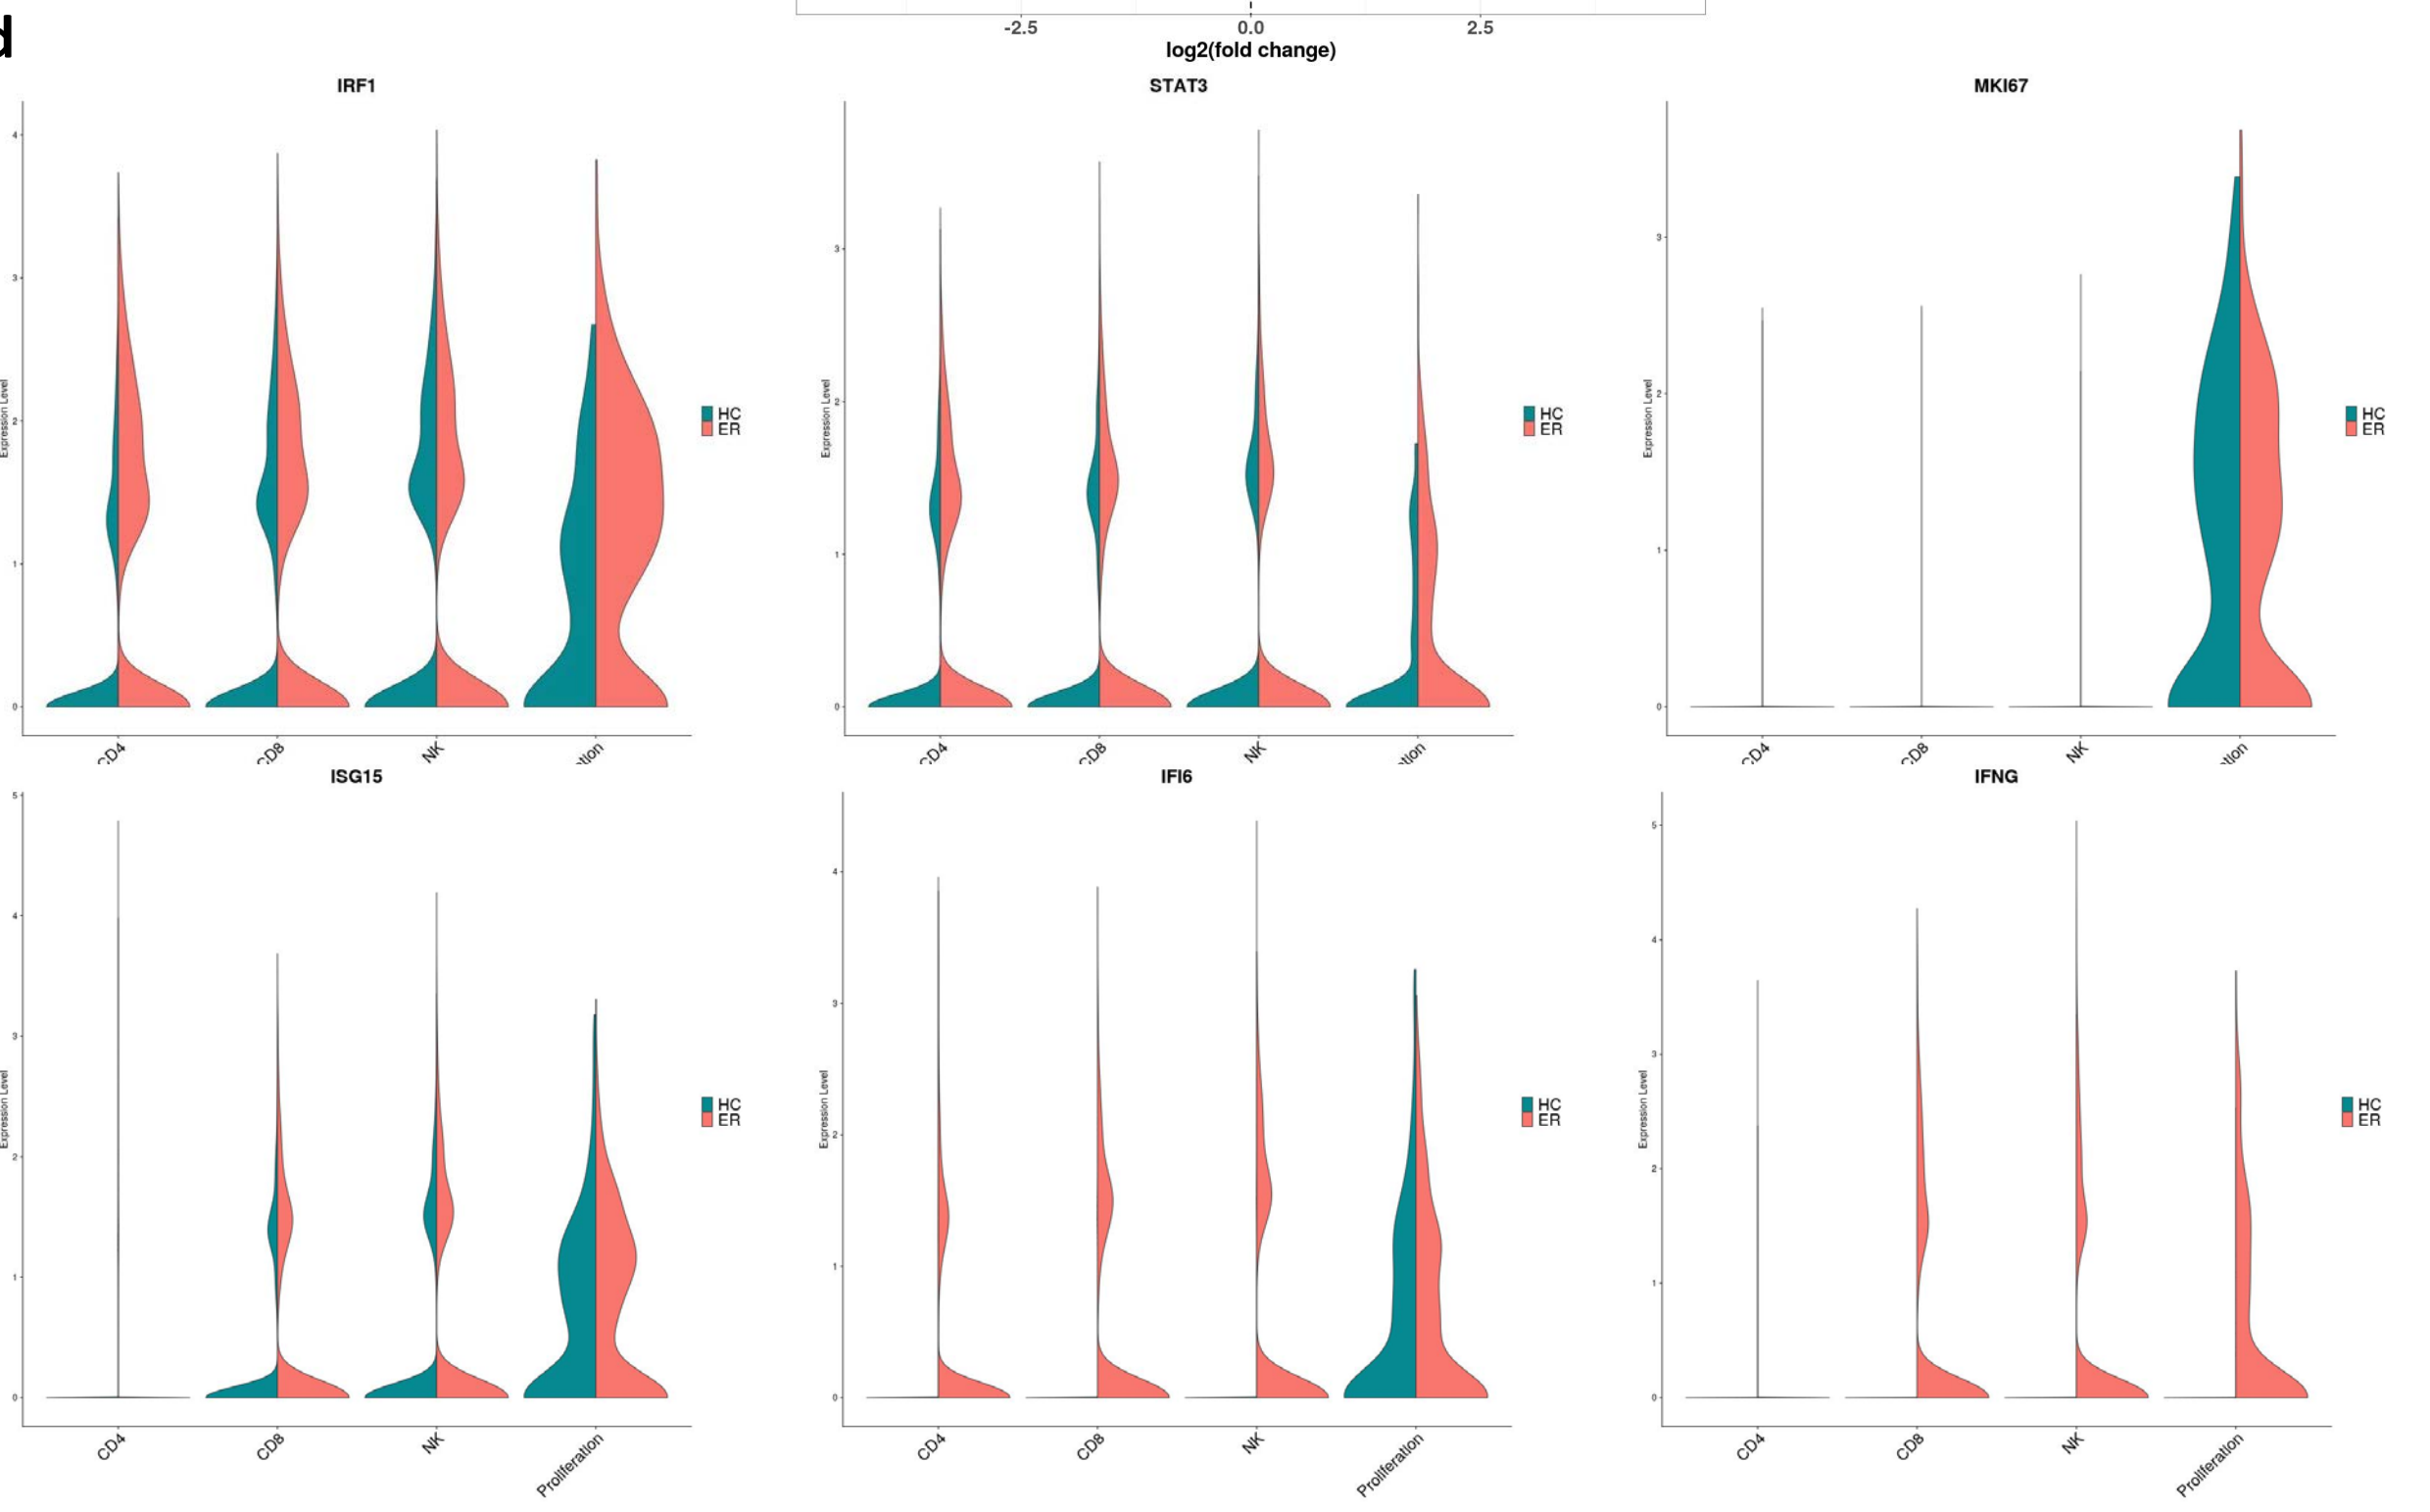



a

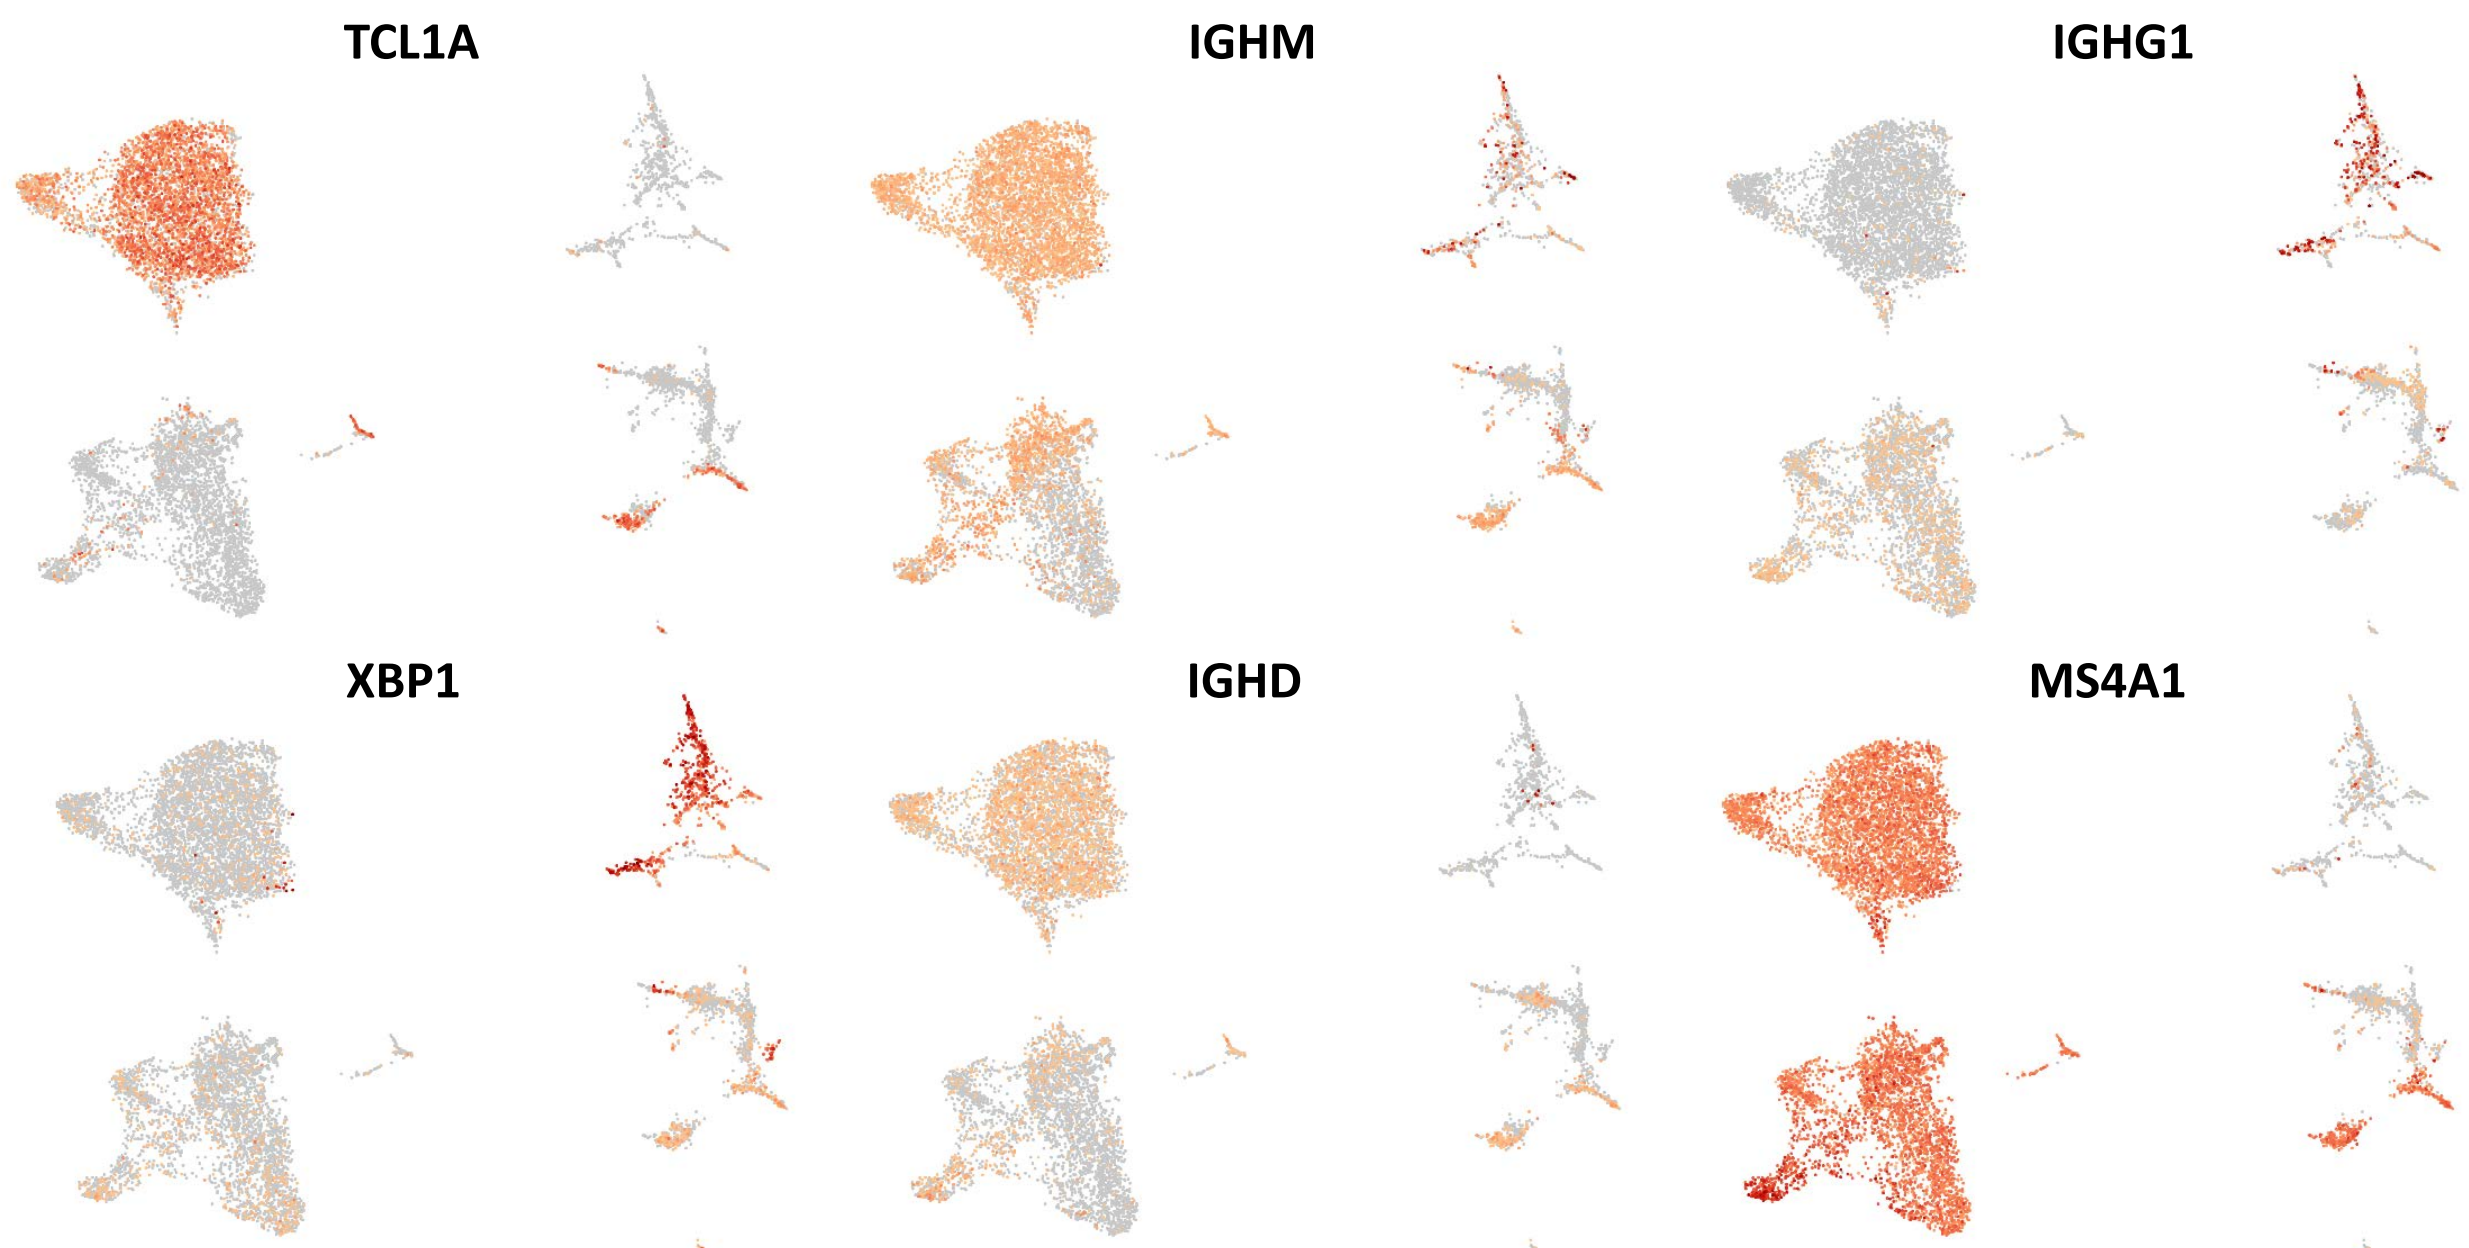

b

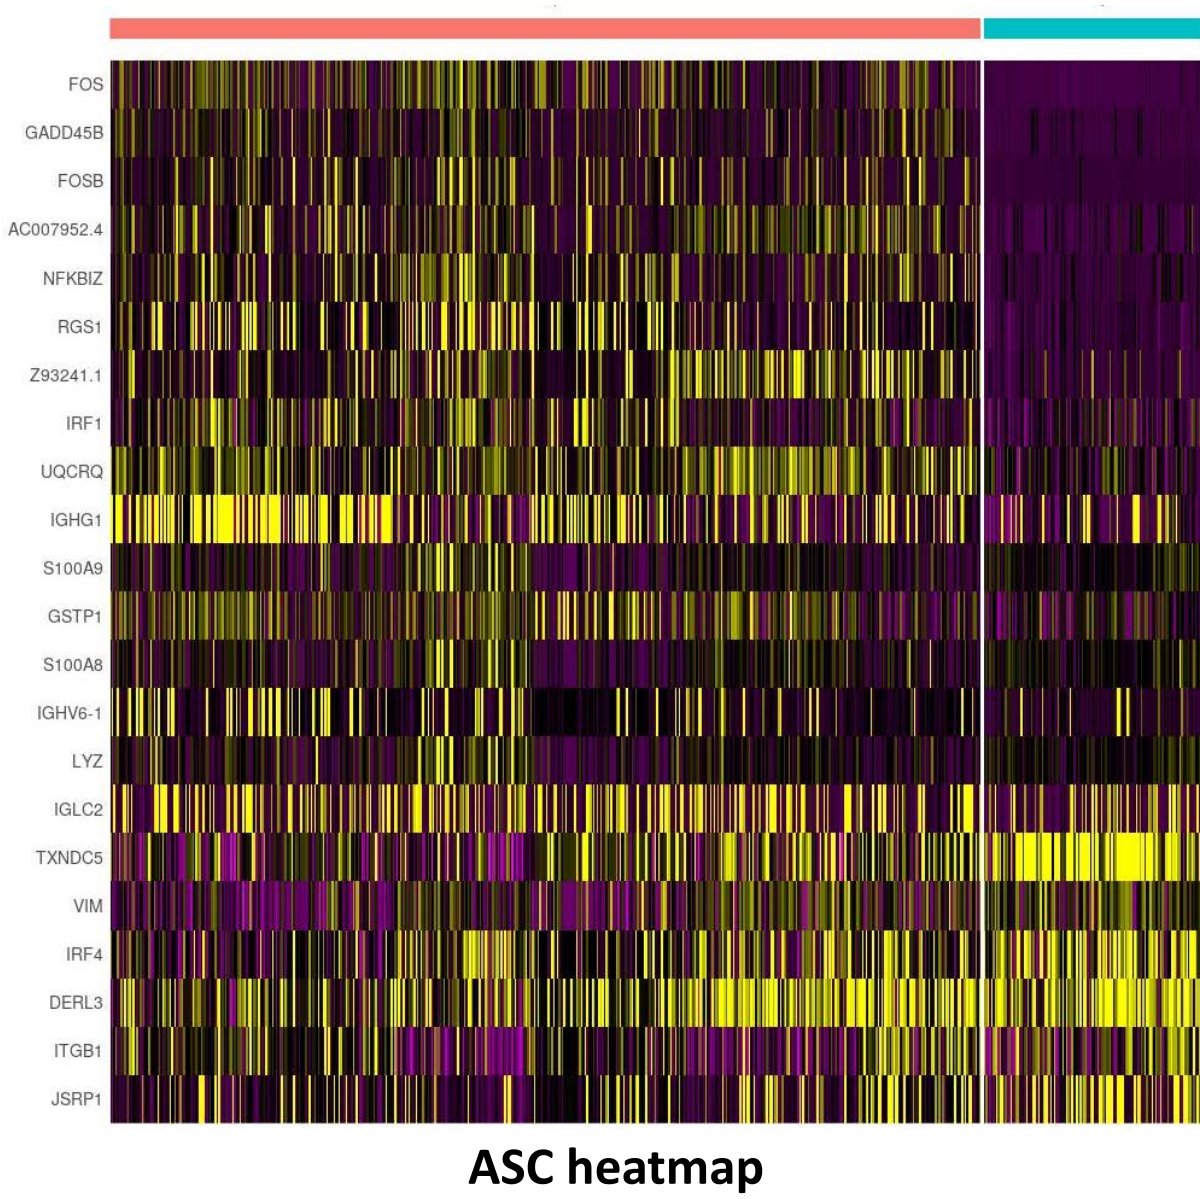

c

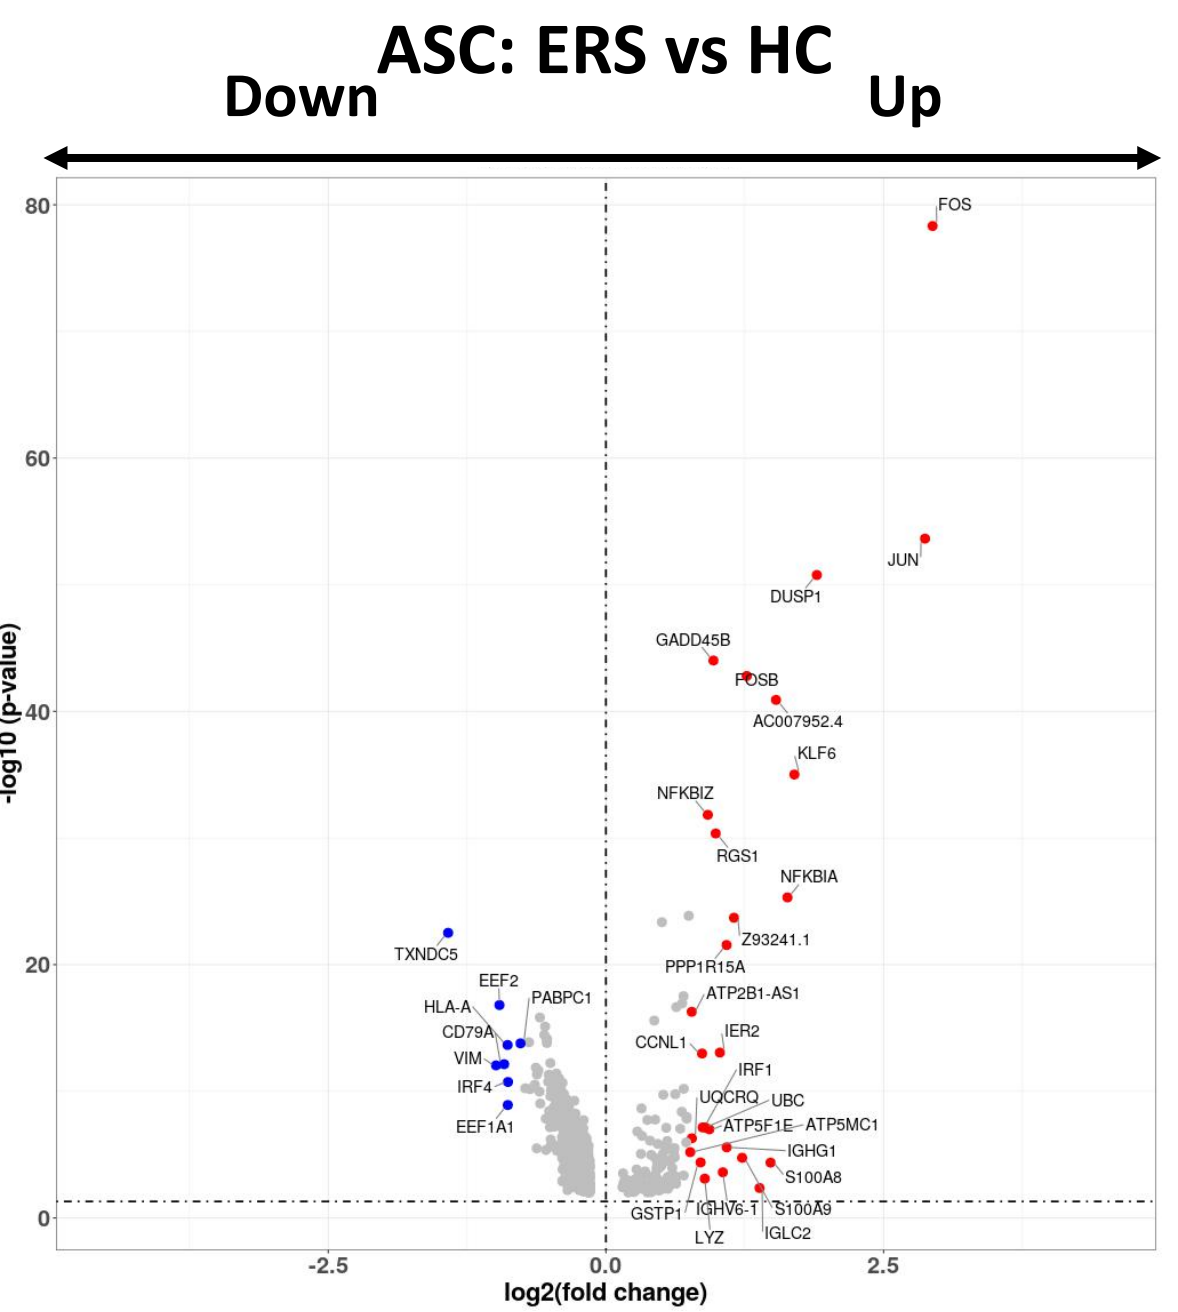

d

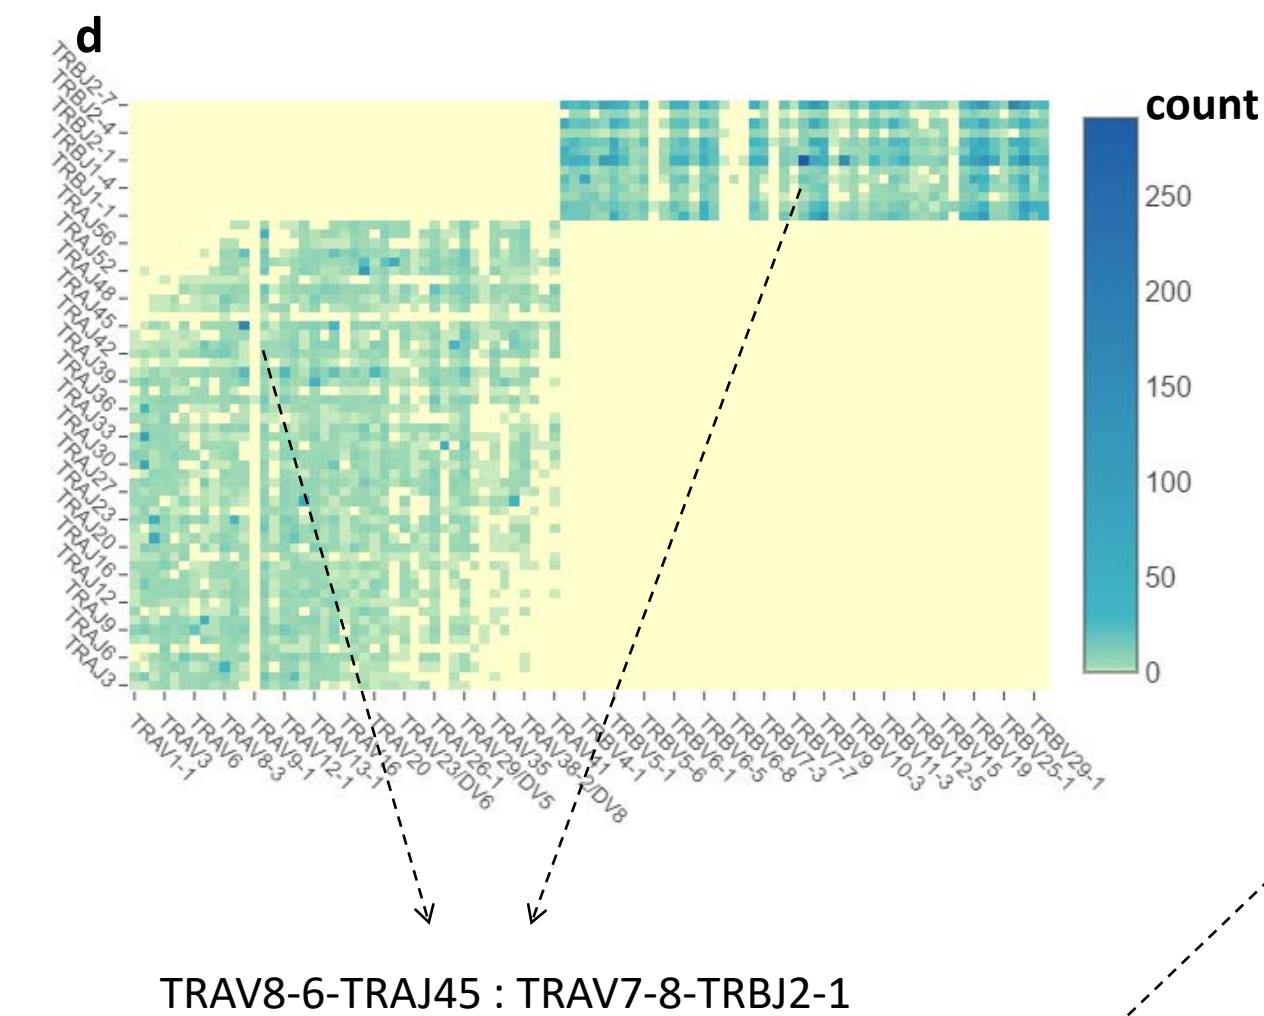

e

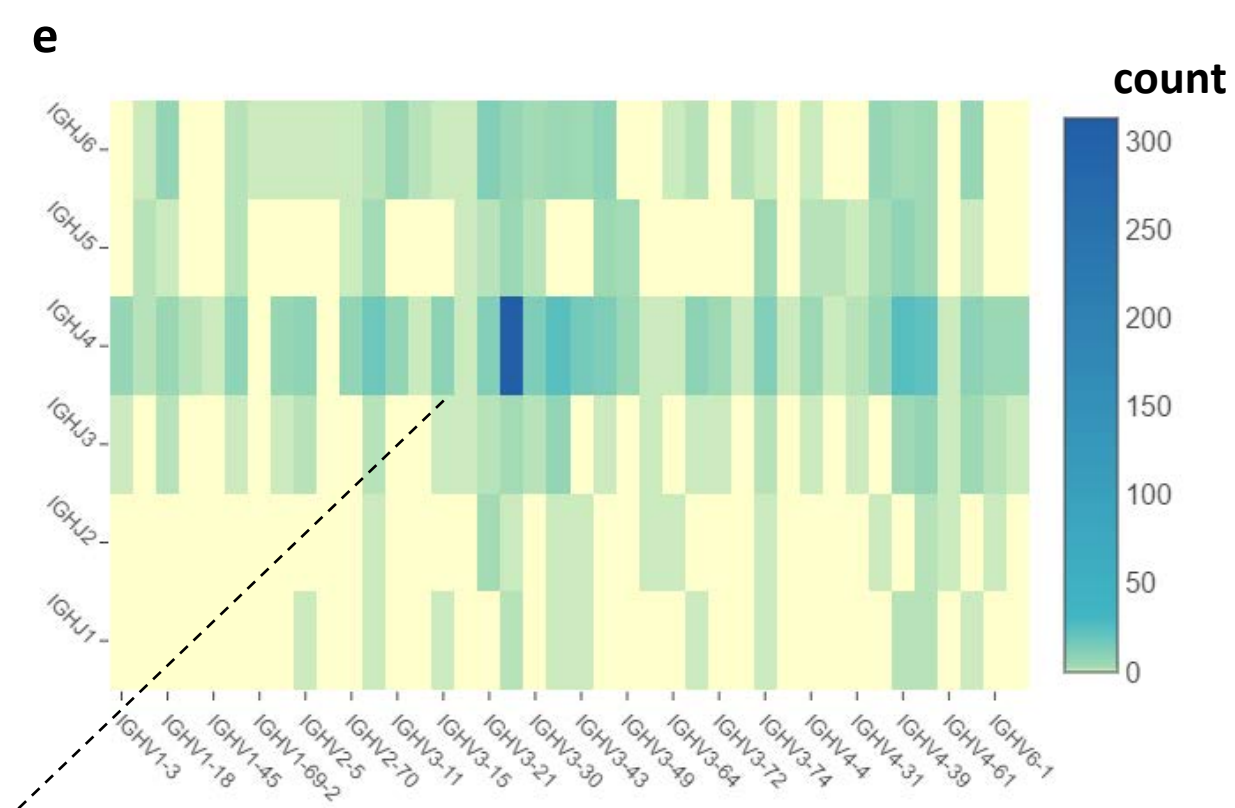

f

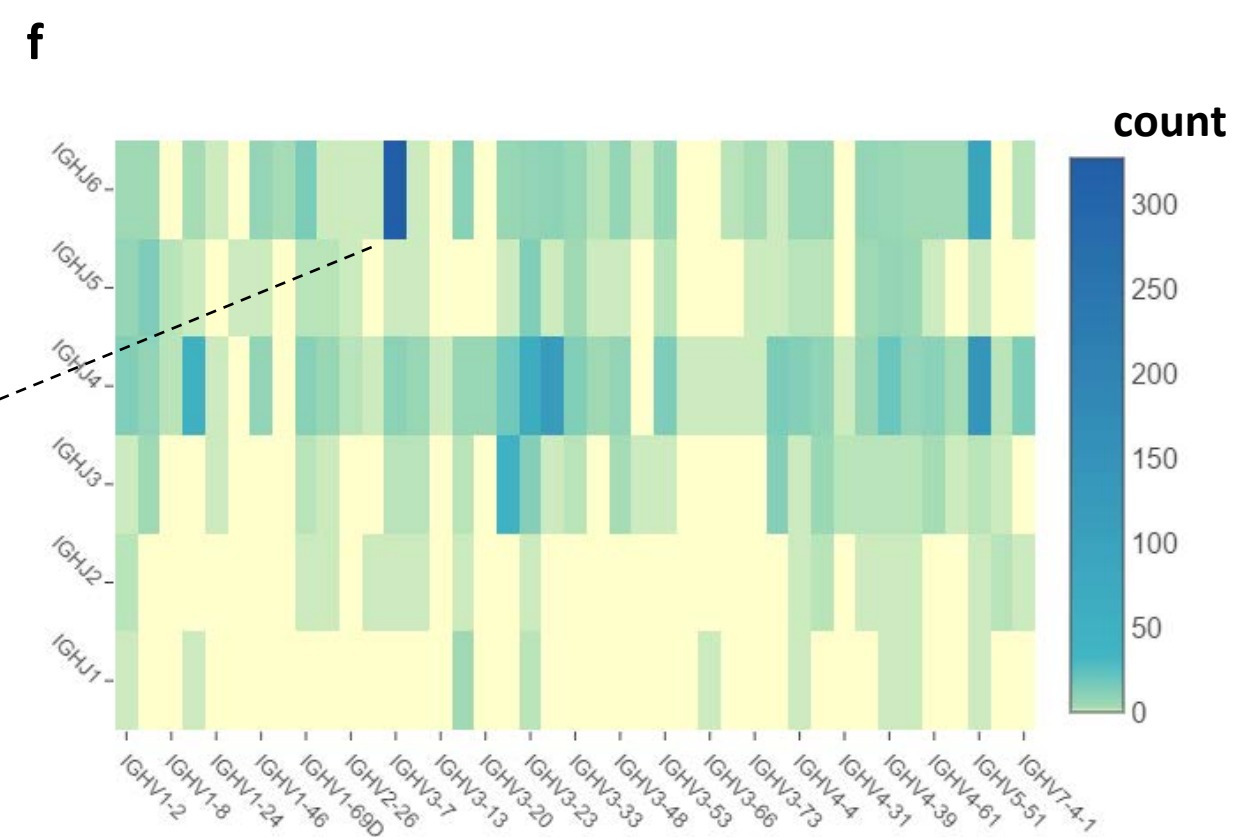

IGHV3-23-IGHJ4 : IGLV1-44-IGLJ3

IGHV3-7- IGHJ6 : IGKV1-17-IGKJ1



## Figure legends

**Supplementary figure S1.** The detail information of patients and healthy controls.

(a-b) The clinical characteristics of the patients (a) and healthy donors (b) are reported in Supplementary figure S1.

(c) No significant differences were detected between HC, ERS group and LRS group. P-Value for categories were calculated using Chi-square analysis. P-value for numerical values were determined using One-Way ANOVA test.

**Supplementary figure S2.**

(a) tSNE plot showing the myeloid cells (red), NK&T cells (blue), B cells (green) and other clusters (grey) of PBMCs of each research object.

**Supplementary figure S3.** Analysis of myeloid cells subsets landscape in COVID-19 patients.

(a) The heatmap of DCs showing the DEGs between COVID-19 patients and HCs.

(b) The volcano plot shows the DEGs of DCs between COVID-19 patients and HCs.

(c) The violin plot shows the *JUNB*, *FOS*, *S100A8*, *ISG15*, *IRF1*, *IFI6*, *CXCR4*, *IL1B*, *CD83* were highly expressed in COVID-19 patients vs HCs in myeloid cells. P values were calculated using a paired, two-sided Wilcoxon test and FDR corrected using the Benjamini–Hochberg procedure.

**Supplementary figure S4.** Analysis of NK and T subsets landscape in COVID-19 patients.

(a) The UAMP plot showing subtype-specific marker genes of NK and T cells including *KLRF1*, *KLRC1*, *PRF1*, *CCL5*, *TCF7*, *LEF1*, *CD69*, *CD27*, *CTLA4*, *CCR6*, *GZMB* and *TYMS*.

(b) GO BP enrichment analysis of the DEGs of CD8<sup>+</sup> CTLs between the COVID-19 patients vs. the HCs. P value was derived by a hypergeometric test.

(c) The volcano plot shows the DEGs of ERS COVID-19 patients vs. HCs in proliferating T cells. P values were calculated using a paired, two-sided Wilcoxon test and FDR corrected using the Benjamini–Hochberg procedure.

(d) The violin plot shows the *IRF1*, *STAT3*, *MKI67*, *ISG15*, *IFI6* and *IFNG* were highly expressed in ERS COVID-19 patients vs HCs in NK and T sub-clusters.

**Supplementary figure S5.** Analysis of B cell subsets landscape in COVID-19 patients.

(a) The UAMP plot showing subtype-specific marker genes of B cells including *TCL1A*, *IGHM*, *IGHG1*, *XBP1*, *IGHD* and *MS4A1*.

(b) The heatmap of ASCs showing the DEGs between COVID-19 patients and HCs.

(c) The volcano plot shows the DEGs of COVID-19 patients vs. HCs in ASCs. P values were calculated using a paired, two-sided Wilcoxon test and FDR corrected using the Benjamini–Hochberg procedure.

(d) Heat map showing TRA and TRB rearrangements in peripheral blood samples from ERS group.

(e) Heat map showing IGH rearrangements in peripheral blood samples from ERS-4 sample.

(f) Heat map showing IGH rearrangements in peripheral blood samples from ERS-5 sample.
